# Supplementary material
Source: Springer Nature journal article supplement (http://www.springermedizin.de/resource/supplementary/13014_2009_217_MOESM1_ESM.pdf/9633172)

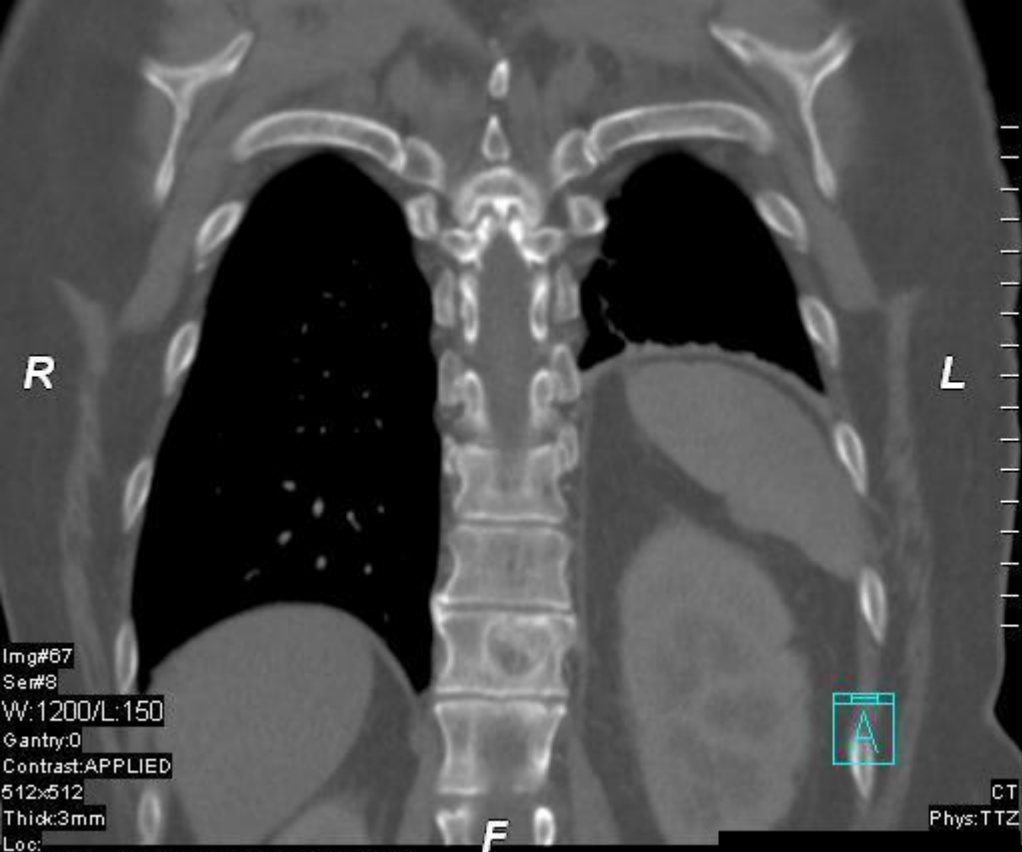

R

L

Img#67  
Ser#8  
W: 1200/L: 150  
Gantry: 0  
Contrast: APPLIED  
512x512  
Thick: 3mm  
Loc:

A

F

CT  
Phys: TTZ

Supplement: MOESM1 [file 9633172]
